# Supplementary material for: Pyrolysis of municipal sewage sludge: challenges, opportunities and new valorization routes for biochar, bio-oil, and pyrolysis gas
Source: Royal Society of Chemistry journal article supplement (doi:10.1039/d4ew00278d), 2024-01-01
Supplement: d4ew00278d1.pdf [file d4ew00278d1.pdf]

1 **Title:** Pyrolysis of municipal sewage sludge: challenges, opportunities and new valorization routes  
2 for biochar, bio-oil, and pyrolysis gas.

3 **Authors:** Vincenzo Pelagalli <sup>a</sup>, Michela Langone <sup>b</sup>, Silvio Matassa <sup>c</sup>, Marco Race <sup>a</sup>, Riccardo Tuffi <sup>d</sup>,  
4 Stefano Papirio <sup>e</sup>, Piet N.L. Lens <sup>e</sup>, Marco Lazzazzara <sup>f</sup>, Alessandro Frugis <sup>f</sup>, Luigi Petta <sup>g</sup>, Giovanni  
5 Esposito <sup>c</sup>

6 <sup>a</sup> Department of Civil and Mechanical Engineering, University of Cassino and Southern Lazio, Via Di Biasio 43, 03043  
7 Cassino, Italy. (E-mail: vincenzo.pelagalli@unicas.it; marco.race@unicas.it).

8 <sup>b</sup> Laboratory Technologies for the Efficient Use and Management of Water and Wastewater, Italian National Agency  
9 for New Technologies, Energy and Sustainable Economic Development (ENEA), Via Anguillarese, 301, 00123 Rome,  
10 Italy. (E-mail: michela.langone@ENEA.it).

11 <sup>c</sup> Department of Civil, Architectural and Environmental Engineering, University of Napoli Federico II, Via Claudio 21,  
12 80125 Napoli, Italy. (E-mail: silvio.matassa@unina.it; stefano.papirio@unina.it; giospos@unina.it).

13 <sup>d</sup> Laboratory Technologies for the Reuse, Recycling, Recovery and valorization of Waste and Materials, Italian National  
14 Agency for New Technologies, Energy and Sustainable Economic Development (ENEA), Via Anguillarese, 301, 00123  
15 Rome, Italy. (E-mail: riccardo.tuffi@ENEA.it).

16 <sup>e</sup> National University of Ireland, Galway, University Road, Galway, H91 TK33, Ireland.

17 (E-mail: piet.lens@universityofgalway.ie).

18 <sup>f</sup> ACEA ELABORI SpA, Via Vitorchiano 165, Rome, Italy. (E-mail: marco.lazzazzara@aceaspa.it;  
19 alessandro.frugis@aceaspa.it).

20 <sup>g</sup> Laboratory Technologies for the Efficient Use and Management of Water and Wastewater, Italian National Agency  
21 for New Technologies, Energy and Sustainable Economic Development (ENEA), Via Martiri di Monte Sole, 4, 40129  
22 Bologna, Italy. (E-mail: luigi.petta@ENEA.it).

23

24 *Corresponding author:* Vincenzo Pelagalli (E-mail: vincenzo.pelagalli@unicas.it)

25

## 26 **Supplementary material**

### 27 **A. European legislation on municipal sewage sludge management**

28 To establish more sustainable municipal sewage sludge (MSS) management practices, extensive  
29 legislation was produced by the European Commission. MSS is classified as a “non-hazardous” solid  
30 waste <sup>1</sup>. Several directives from the European Union such as the Water Framework Directive <sup>2</sup> and  
31 the Waste Framework Directive <sup>3</sup> influence MSS management by establishing a hierarchical approach  
32 foreseeing waste prevention (*e.g.* minimization techniques), preparation for reuse (*e.g.* chemical or  
33 biological stabilization), recycling (*e.g.* material recovery), other recovery (*e.g.* energy recovery), and  
34 disposal (*e.g.* landfilling) <sup>4</sup>.

35 The implementation of the Council Directive 91/271/EEC <sup>5</sup> concerning urban wastewater treatment,  
36 also known as “Urban Waste Water Treatment Directive” (UWWTD), has affected the increase in  
37 the amount of generated MSS. However, the Directive encourages the valorization of MSS whenever  
38 appropriate and regulates its use in order to minimize hazardous effects on the environment; thus, it

39 was determinant for adapting to other disposal and treatment methods beyond the landfill.  
40 Subsequently, the Council Directive 91/676/EEC <sup>6</sup>, concerning water protection against pollution  
41 caused by nitrates from agricultural sources, resulted in a reduction of areas on which MSS can be  
42 used for agricultural purposes. Council Directive 1999/31/EEC <sup>7</sup> introduced stringent new standards  
43 related to landfilling of biodegradable waste, while Directive 2018/850 <sup>8</sup> amended the former by  
44 extending such limitations to “*waste that is suitable for recycling or other recovery*”, therefore  
45 including MSS.

46 Generally, MSS recovery methods can be categorized under two different management routes: an  
47 organic recycling route (including agricultural spreading and composting) and a route focused on the  
48 recovery of energy and materials (including thermochemical conversion methods) <sup>9</sup>. In order to align  
49 the Directive with the ambitions reported in the European Green Deal and the Zero Pollution Action  
50 Plan, the European Commission opened in 2020 a public consultation for the revision of the UWWTD  
51 <sup>10</sup>, including new circular approaches to MSS management for the recovery of nutrients, materials  
52 and energy, as well as the importance of MSS usage as fertilizer.

53 The most meaningful document concerning the organic recycling route is the Council Directive  
54 1986/278/EEC <sup>11</sup>, also known as “Sewage Sludge Directive” (SSD), which is aimed at regulating the  
55 use of MSS in agriculture. On the other hand, toxic organic and inorganic pollutants contained within  
56 MSS could be highly dangerous if dispersed in the environment because of their persistence and  
57 possible toxicity to people and wildlife <sup>12-16</sup>. By defining specific limits on potentially toxic elements  
58 (PTEs) concentration both in treated MSS and soils on which MSS is distributed, the SSD aimed at  
59 preventing harmful effects on soil, vegetation, animals and humans. To this end, it also prohibits the  
60 use of untreated MSS on agricultural land unless it is injected or incorporated into the soil. The SSD  
61 did not introduce limits on organic pollutants concentration nor on the presence of pathogens in soils.  
62 Therefore, to mitigate the environmental risks associated with the agricultural reuse of MSS, many  
63 EU Member States have established their own legislation to regulate these substances within MSS  
64 and/or soils, further setting more stringent limits for PTEs <sup>17</sup>. Lately, in light of the most recent  
65 environmental strategies and planning tools such as the New Circular Economy Action Plan <sup>18</sup>, the  
66 European Green Deal <sup>19</sup>, the Bioeconomy Strategy <sup>20</sup>, the Farm to Fork Strategy <sup>21</sup>, the EU  
67 Biodiversity Strategy for 2030 <sup>22</sup>, and the post-Covid-19 recovery plan for Europe <sup>23</sup>, the Directive  
68 has gained additional significance and a process of revision is currently ongoing <sup>24</sup>, in order to exploit  
69 the potential of MSS in the context of the circular economy transition, in order to contribute to  
70 increasing resource efficiency and protect human health. A first result of this revision process has  
71 been the new Regulation 2019/1009 <sup>25</sup> on the market of fertilizing products, introducing for the first

72 time organic and, in particular, bio-based and recovered fertilizers beyond mineral/inorganic ones as  
73 fertilizing products, aiming to harmonize their production and composition. Due to their  
74 micropollutant content, “pyrolysis and gasification materials” (including biochar) derived from MSS  
75 have been excluded from the EU fertilizing products <sup>26</sup>.

76 Regarding the material recycling route, many valuable raw materials can be recovered from MSS:  
77 water, compost, nutrients, agronomic additives, sulfur, phosphorous salts, fibers, proteins, biomass,  
78 up to more complex materials such as biopolymers <sup>27–32</sup>. However, in accordance with the Waste  
79 Framework Directive, most of these materials are classified as waste when obtained from MSS.  
80 Nevertheless, the new Fertilising Products Regulation <sup>25</sup>, applied from July 2022, already defined  
81 conditions to obtain an “End-of-Waste” status for struvite and ash-based products from MSS. In order  
82 to develop a real market for such secondary materials, additional criteria should be proposed and  
83 discussed at the EU level in the near future.

84 Finally, concerning the energy recovery route, the EU aims to the following main waste-to-energy  
85 processes: incineration, AD, production of waste-derived solid, liquid or gaseous fuels, and other  
86 thermal treatments such as pyrolysis or gasification <sup>33</sup>. With this scope, Directive 2009/28/EC <sup>34</sup>  
87 (subsequently modified to the currently in-force Directive 2018/2001 <sup>35</sup>) promoted the use of energy  
88 from renewable sources, recognizing energy derived from biomass, landfills, and WWTP as a  
89 renewable energy source.

## 90 **References**

- 91 1 European Commission, Commission Decision of 3 May 2000 replacing Decision 94/3/EC  
92 establishing a list of wastes pursuant to Article 1(a) of Council Directive 75/442/EEC on waste  
93 and Council Decision 94/904/EC establishing a list of hazardous waste pursuant to Article 1(4)  
94 of Council Directive 91/689/EEC on hazardous waste (notified under document number  
95 C(2000) 1147) (Text with EEA relevance), 2000, <http://data.europa.eu/eli/dec/2000/532/oj>,  
96 (accessed 07 April 2024).
- 97 2 European Commission, Directive 2000/60/EC of the European Parliament and of the Council of  
98 23 October 2000 establishing a framework for Community action in the field of water policy,  
99 2000, <http://data.europa.eu/eli/dir/2000/60/oj>, (accessed 07 April 2024).
- 100 3 European Parliament and Council, Directive 2008/98/EC of the European Parliament and of the  
101 Council of 19 November 2008 on waste and repealing certain Directives (Text with EEA  
102 relevance), <http://data.europa.eu/eli/dir/2008/98/oj>, (accessed 24 January 2024).
- 103 4 M. C. Collivignarelli, A. Abbà, A. Frattarola, M. C. Miino, S. Padovani, I. Katsoyiannis and V.  
104 Torretta, sustainability Legislation for the Reuse of Biosolids on Agricultural Land in Europe:  
105 Overview, , DOI:10.3390/su11216015.

- 106 5 Council of the European Communities, COUNCIL DIRECTIVE of 21 May 1991 concerning  
107 urban waste water treatment (91/271/EEC), 1991, <http://data.europa.eu/eli/dir/1991/271/oj>,  
108 (accessed 07 April 2024).
- 109 6 Council of the European Communities, Council Directive 91/676/EEC of 12 December 1991  
110 concerning the protection of waters against pollution caused by nitrates from agricultural  
111 sources, 1991, <http://data.europa.eu/eli/dir/1991/676/oj>, (accessed 07 April 2024).
- 112 7 European Commission, COUNCIL DIRECTIVE 1999/31/EC of 26 April 1999 on the landfill  
113 of waste, 1999, <http://data.europa.eu/eli/dir/1999/31/oj>, (accessed 07 April 2024).
- 114 8 European Parliament and Council, Directive (EU) 2018/850 of the European Parliament and of  
115 the Council of 30 May 2018 amending Directive 1999/31/EC on the landfill of waste (Text with  
116 EEA relevance), <http://data.europa.eu/eli/dir/2018/850/oj>, (accessed 24 January 2024).
- 117 9 M. Kacprzak, E. Neczaj, K. Fijałkowski, A. Grobelak, A. Grosser, M. Worwag, A. Rorat, H.  
118 Brattebo, Å. Almås and B. R. Singh, Sewage sludge disposal strategies for sustainable  
119 development, *Environ Res*, 2017, 156, 39–46.
- 120 10 European Commission, Proposal for a DIRECTIVE OF THE EUROPEAN PARLIAMENT  
121 AND OF THE COUNCIL concerning urban wastewater treatment (recast).
- 122 11 Council Directive 86/278/EEC, Council Directive 86/278/EEC of 12 June 1986 on the  
123 protection of the environment, and in particular of the soil, when sewage sludge is used in  
124 agriculture, *Official Journal L 181* , 04/07/1986 P. 0006 - 0012.
- 125 12 C. Li, N. Le-Minh, J. A. McDonald, A. S. Kinsela, R. M. Fisher, D. Liu and R. M. Stuetz,  
126 Occurrence and risk assessment of trace organic contaminants and metals in anaerobically co-  
127 digested sludge, *Science of The Total Environment*, 2022, 816, 151533.
- 128 13 M. D. Hatinoğlu and F. D. Sanin, Sewage sludge as a source of microplastics in the  
129 environment: A review of occurrence and fate during sludge treatment, *J Environ Manage*,  
130 2021, 295, 113028.
- 131 14 L. Lamastra, N. A. Suciú and M. Trevisan, Sewage sludge for sustainable agriculture:  
132 Contaminants' contents and potential use as fertilizer, *Chemical and Biological Technologies  
133 in Agriculture*, , DOI:10.1186/s40538-018-0122-3.
- 134 15 M. Langone, G. Sabia, L. Petta, L. Zanetti, P. Leoni and D. Basso, Evaluation of the aerobic  
135 biodegradability of process water produced by hydrothermal carbonization and inhibition  
136 effects on the heterotrophic biomass of an activated sludge system, *J Environ Manage*, 2021,  
137 299, 113561.
- 138 16 F. Corradini, P. Meza, R. Eguiluz, F. Casado, E. Huerta-Lwanga and V. Geissen, Evidence of  
139 microplastic accumulation in agricultural soils from sewage sludge disposal, *Science of The  
140 Total Environment*, 2019, 671, 411–420.
- 141 17 G. Mininni, A. R. Blanch, F. Lucena and S. Berselli, EU policy on sewage sludge utilization and  
142 perspectives on new approaches of sludge management, *Environmental Science and Pollution  
143 Research*, , DOI:10.1007/s11356-014-3132-0.

- 144 18 European Commission, Communication from the Commission: A new Circular Economy  
145 Action Plan For a cleaner and more competitive Europe, [https://eur-lex.europa.eu/legal-](https://eur-lex.europa.eu/legal-content/EN/TXT/HTML/?uri=CELEX:52020DC0098)  
146 [content/EN/TXT/HTML/?uri=CELEX:52020DC0098](https://eur-lex.europa.eu/legal-content/EN/TXT/HTML/?uri=CELEX:52020DC0098), (accessed 1 June 2023).
- 147 19 European Commission, Communication from the Commission: The European Green Deal,  
148 2019, <https://eur-lex.europa.eu/legal-content/EN/TXT/HTML/?uri=CELEX:52019DC0640>,  
149 (accessed 1 June 2023).
- 150 20 European Commission, A sustainable bioeconomy for Europe – Strengthening the connection  
151 between economy, society and the environment: updated bioeconomy strateg, 2018,  
152 <https://data.europa.eu/doi/10.2777/792130>, (accessed 1 June 2023).
- 153 21 European Commission, Communication from the Commission: A Farm to Fork Strategy,  
154 <https://eur-lex.europa.eu/legal-content/EN/TXT/HTML/?uri=CELEX:52020DC0381>,  
155 (accessed 1 June 2023).
- 156 22 European Commission, EU biodiversity strategy for 2030 – Bringing nature back into our lives,  
157 2021, <https://data.europa.eu/doi/10.2779/677548>, (accessed 1 June 2023).
- 158 23 European Commission, The EU’s 2021-2027 long-term budget and NextGenerationEU – Facts  
159 and figures, 2021, <https://data.europa.eu/doi/10.2761/808559>, (accessed 1 June 2023).
- 160 24 European Commission, Sewage sludge use in farming: evaluation,  
161 [https://ec.europa.eu/info/law/better-regulation/have-your-say/initiatives/12328-Sewage-](https://ec.europa.eu/info/law/better-regulation/have-your-say/initiatives/12328-Sewage-sludge-use-in-farming-evaluation_en)  
162 [sludge-use-in-farming-evaluation\\_en](https://ec.europa.eu/info/law/better-regulation/have-your-say/initiatives/12328-Sewage-sludge-use-in-farming-evaluation_en), (accessed 1 June 2023).
- 163 25 European Parliament and Council, Regulation (EU) 2019/1009 of the European Parliament and  
164 of the Council of 5 June 2019 laying down rules on the making available on the market of EU  
165 fertilising products and amending Regulations (EC) No 1069/2009 and (EC) No 1107/2009 and  
166 repealing Regulation (EC) No 2003/2003 (Text with EEA relevance), 2019,  
167 <http://data.europa.eu/eli/reg/2019/1009/oj>, (accessed 03 June 2023).
- 168 26 European Commission, 2021, ANNEXES to the Commission Delegated Regulation amending  
169 Annexes II, III and IV to Regulation (EU) 2019/1009 of the European Parliament and of the  
170 Council for the purpose of adding pyrolysis or gasification materials as a component material  
171 category in EU fertilising products, [https://ec.europa.eu/info/law/better-regulation/have-your-](https://ec.europa.eu/info/law/better-regulation/have-your-say/initiatives/12136-Fertilising-products-pyrolysis-and-gasification-materials_en)  
172 [say/initiatives/12136-Fertilising-products-pyrolysis-and-gasification-materials\\_en](https://ec.europa.eu/info/law/better-regulation/have-your-say/initiatives/12136-Fertilising-products-pyrolysis-and-gasification-materials_en), (accessed  
173 02/02/2022)
- 174 27 M. Hu, H. Hu, Z. Ye, S. Tan, K. Yin, Z. Chen, D. Guo, H. Rong, J. Wang, Z. Pan and Z. T. Hu,  
175 A review on turning sewage sludge to value-added energy and materials via thermochemical  
176 conversion towards carbon neutrality, *J Clean Prod*, 2022, 379, 134657.
- 177 28 L. Isern-Cazorla, A. Mineo, M. E. Suárez-Ojeda and G. Mannina, Effect of organic loading rate  
178 on the production of Polyhydroxyalkanoates from sewage sludge, *J Environ Manage*, 2023,  
179 343, 118272.
- 180 29 M. Hušek, J. Moško and M. Pohořelý, Sewage sludge treatment methods and P-recovery  
181 possibilities: Current state-of-the-art, *J Environ Manage*, 2022, 315, 115090.
- 182 30 S. Vilakazi, E. Onyari, O. Nkwonta and J. K. Bwapwa, Reuse of domestic sewage sludge to  
183 achieve a zero waste strategy & improve concrete strength & durability - A review,  
184 *S Afr J Chem Eng*, 2023, 43, 122–127.

- 185 31 K. Chojnacka, D. Skrzypczak, D. Szopa, G. Izydorzycyk, K. Moustakas and A. Witek-Krowiak,  
186 Management of biological sewage sludge: Fertilizer nitrogen recovery as the solution to  
187 fertilizer crisis, *J Environ Manage*, 2023, 326, 116602.
- 188 32 A. Raheem, V. S. Sikarwar, J. He, W. Dastyar, D. D. Dionysiou, W. Wang and M. Zhao,  
189 *Chemical Engineering Journal*, 2018, 337, 616–641.
- 190 33 European Commission, Communication from the Commission to the European Parliament, the  
191 Council, the European economic and social committee and the Committee of the regions: The  
192 role of waste-to-energy in the circular economy, 2017, [https://eur-lex.europa.eu/legal-](https://eur-lex.europa.eu/legal-content/EN/TXT/HTML/?uri=CELEX:52017DC0034)  
193 [content/EN/TXT/HTML/?uri=CELEX:52017DC0034](https://eur-lex.europa.eu/legal-content/EN/TXT/HTML/?uri=CELEX:52017DC0034), (accessed 07 April 2024).
- 194 34 European Parliament and Council, Directive 2009/28/EC of the European Parliament and of the  
195 Council of 23 April 2009 on the promotion of the use of energy from renewable sources and  
196 amending and subsequently repealing Directives 2001/77/EC and 2003/30/EC, 2009,  
197 <http://data.europa.eu/eli/dir/2009/28/oj>.
- 198 35 European Parliament and Council, DIRECTIVE (EU) 2018/2001 OF THE EUROPEAN  
199 PARLIAMENT AND OF THE COUNCIL of 11 December 2018 on the promotion of the use  
200 of energy from renewable sources, 2018, <http://data.europa.eu/eli/dir/2018/2001/2023-11-20>,  
201 (accessed 07 April 2024).

202
